# Supplementary material for: Adaptive Evolution of Conserved Noncoding Elements in Mammals
Source: PLOS journal article supplement (doi:10.1371/journal.pgen.0030147), 2007-09-05
Supplement: S6 (10.1371/journal.pgen.0030147.s006) [file journal.pgen.0030147.s006]

Supplementary Table 6: The top 10 biological process GO categories that are enriched near the mammalian CNCs

showing a rate speed-up on each lineage relative to “neutral” CNCs evolving under the null model (by AIC). The one-sided p-values are computed using the Fisher's exact test and are corrected by Bonferroni criterion (p*-values). Any category that includes less than two genes near CNCs showing a rate speed-up is removed from the list.

|  | Key | Obs | Exp | p-value | p*-value | GO category |
| --- | --- | --- | --- | --- | --- | --- |
|  |  |  |  |  |  |  |
| Human | 16_1 | 7 | 1.61 | 0.0015 | 0.2247 | T-cell mediated immunity |
| Human | 26 | 39 | 30.11 | 0.1082 | 3.3552 | cell structure and motility |
| Human | 15 | 40 | 31.46 | 0.1169 | 3.6254 | transport |
| Human | 16_2 | 3 | 0.64 | 0.0285 | 4.1862 | B-cell- and antibody-mediated immunity |
| Human | 20 | 10 | 6.23 | 0.1506 | 4.6698 | homeostasis |
| Human | 22_9 | 2 | 0.32 | 0.0453 | 6.6592 | endoderm development |
| Human | 18 | 36 | 29.62 | 0.2176 | 6.7453 | neuronal activities |
| Human | 28 | 39 | 32.43 | 0.2361 | 7.3199 | cell adhesion |
| Human | 21_7 | 4 | 1.37 | 0.0526 | 7.7334 | other sensory perception |
| Human | 21 | 10 | 7.10 | 0.2532 | 7.8491 | sensory perception |
| Chimp | 4_13 | 7 | 2.08 | 0.0058 | 0.8546 | chromatin packaging and remodeling |
| Chimp | 2_4 | 3 | 0.45 | 0.0121 | 1.7764 | amino acid catabolism |
| Chimp | 14 | 8 | 4.29 | 0.0838 | 2.5970 | protein targeting and localization |
| Chimp | 10 | 5 | 2.42 | 0.0995 | 3.0856 | sulfur metabolism |
| Chimp | 11 | 11 | 6.52 | 0.1076 | 3.3342 | other metabolism |
| Chimp | 9 | 4 | 2.00 | 0.1448 | 4.4893 | phosphate metabolism |
| Chimp | 4 | 75 | 64.49 | 0.1566 | 4.8537 | nucleoside, nucleotide and nucleic acid metabolism |
| Chimp | 2 | 6 | 3.53 | 0.1753 | 5.4347 | amino acid metabolism |
| Chimp | 22_8 | 53 | 39.91 | 0.0371 | 5.4570 | ectoderm development |
| Chimp | 22_8_1 | 51 | 37.96 | 0.0330 | 6.6078 | neurogenesis |
| Mouse | 14 | 23 | 14.71 | 0.0459 | 1.4236 | protein targeting and localization |
| Mouse | 4_6 | 7 | 2.34 | 0.0122 | 1.7965 | RNA localization |
| Mouse | 30 | 9 | 5.33 | 0.1231 | 3.8161 | miscellaneous |
| Mouse | 14_2 | 4 | 1.10 | 0.0299 | 4.3905 | asymmetric protein localization |
| Mouse | 22_2 | 24 | 15.38 | 0.0379 | 5.5776 | gametogenesis |
| Mouse | 2 | 17 | 12.09 | 0.1862 | 5.7711 | amino acid metabolism |
| Mouse | 14_3 | 2 | 0.27 | 0.0402 | 5.9096 | other protein targeting and localization |
| Mouse | 4 | 239 | 220.92 | 0.1971 | 6.1106 | nucleoside, nucleotide and nucleic acid metabolism |
| Mouse | 4_13 | 13 | 7.12 | 0.0552 | 8.1074 | chromatin packaging and remodeling |
| Mouse | 3_3 | 17 | 10.44 | 0.0584 | 8.5869 | lipid metabolism |
| Rat | 11 | 38 | 26.60 | 0.0374 | 1.1594 | other metabolism |
| Rat | 21 | 35 | 24.72 | 0.0508 | 1.5752 | sensory perception |
| Rat | 10 | 16 | 9.86 | 0.0734 | 2.2758 | sulfur metabolism |
| Rat | 22_6 | 27 | 17.14 | 0.0267 | 3.9318 | anterior/posterior patterning |
| Rat | 12_2_1 | 27 | 17.18 | 0.0270 | 5.3988 | calcium mediated signaling |
| Rat | 23 | 78 | 68.24 | 0.2339 | 7.2499 | cell cycle |
| Rat | 1 | 52 | 44.28 | 0.2465 | 7.6424 | carbohydrate metabolism |
| Rat | 5 | 259 | 242.34 | 0.2619 | 8.1197 | protein metabolism and modification |
| Rat | 9 | 11 | 8.15 | 0.2881 | 8.9310 | phosphate metabolism |
| Rat | 4_3 | 20 | 12.97 | 0.0660 | 9.7054 | dna metabolism |
| Primate | 6 | 14 | 6.87 | 0.0187 | 0.5799 | electron transport |
| Primate | 10 | 15 | 8.31 | 0.0337 | 1.0446 | sulfur metabolism |
| Primate | 5_1 | 51 | 35.55 | 0.0130 | 1.9068 | protein biosynthesis |
| Primate | 10_1 | 5 | 1.34 | 0.0147 | 2.1664 | sulfur redox metabolism |
| Primate | 1 | 48 | 37.33 | 0.0930 | 2.8830 | carbohydrate metabolism |
| Primate | 24 | 7 | 3.51 | 0.0967 | 2.9985 | blood circulation and gas exchange |
| Primate | 2 | 18 | 12.13 | 0.1075 | 3.3331 | amino acid metabolism |
| Primate | 16_13 | 10 | 4.98 | 0.0396 | 5.8184 | other immune and defense |
| Primate | 14_3 | 2 | 0.28 | 0.0404 | 5.9434 | other protein targeting and localization |
| Primate | 3_2 | 7 | 3.21 | 0.0494 | 7.2595 | steroid metabolism |
| Rodent | 7_6 | 4 | 0.17 | 0.0001 | 0.0137 | other coenzyme and prosthetic group metabolism |
| Rodent | 4_4 | 171 | 137.13 | 0.0036 | 0.5271 | mRNA transcription |
| Rodent | 4 | 229 | 199.04 | 0.0271 | 0.8411 | nucleoside, nucleotide and nucleic acid metabolism |
| Rodent | 4_4_4 | 143 | 114.75 | 0.0090 | 1.7901 | mRNA transcription regulation |
| Rodent | 31 | 578 | 546.92 | 0.0952 | 2.9523 | biological process unclassified |
| Rodent | 24_1 | 6 | 2.06 | 0.0214 | 3.1395 | regulation of vasoconstriction, dilation |
| Rodent | 22_11 | 2 | 0.22 | 0.0278 | 4.0870 | sex determination |
| Rodent | 24 | 6 | 3.15 | 0.1436 | 4.4511 | blood circulation and gas exchange |
| Rodent | 6 | 10 | 6.17 | 0.1491 | 4.6206 | electron transport |
| Rodent | 7 | 10 | 6.20 | 0.1502 | 4.6559 | coenzyme and prosthetic group metabolism |
| Dog | 5_7 | 12 | 3.31 | 0.0003 | 0.0488 | amino acid activation |
| Dog | 4 | 437 | 399.80 | 0.0526 | 1.6294 | nucleoside, nucleotide and nucleic acid metabolism |
| Dog | 21 | 50 | 37.58 | 0.0540 | 1.6730 | sensory perception |
| Dog | 14 | 35 | 26.61 | 0.1126 | 3.4908 | protein targeting and localization |
| Dog | 26 | 179 | 159.46 | 0.1223 | 3.7919 | cell structure and motility |
| Dog | 4_4_1 | 7 | 2.98 | 0.0392 | 7.8344 | general mRNA transcription activities |
| Dog | 14_1 | 15 | 8.82 | 0.0584 | 8.5787 | protein targeting |
| Dog | 6 | 16 | 12.40 | 0.3083 | 9.5585 | electron transport |
| Dog | 3_1_4 | 2 | 0.28 | 0.0480 | 9.6077 | acyl-coa metabolism |
| Dog | 5_5 | 8 | 3.86 | 0.0658 | 9.6710 | protein complex assembly |
