# Supplementary material for: Adaptive Evolution of Conserved Noncoding Elements in Mammals
Source: PLOS journal article supplement (doi:10.1371/journal.pgen.0030147), 2007-09-05
Supplement: S7 (10.1371/journal.pgen.0030147.s007) [file journal.pgen.0030147.s007]

Supplementary Table 7: The top 10 biological process GO categories that are enriched near the amniotic CNCs showing a rate speed-up on each lineage relative to neutral CNCs (by AIC). For further details of the caption, see Supplementary Table 6.

| Lineage | Key | Obs | Exp | p-value | p*-value | GO category |
| --- | --- | --- | --- | --- | --- | --- |
|  |  |  |  |  |  |  |
| Human | 15_4 | 2 | 0.20 | 0.0207 | 3.0398 | carbohydrate transport |
| Human | 1 | 5 | 2.55 | 0.1166 | 3.6156 | carbohydrate metabolism |
| Human | 22 | 29 | 23.47 | 0.2023 | 6.2728 | developmental processes |
| Human | 17 | 6 | 4.03 | 0.3026 | 9.3810 | oncogenesis |
| Human | 16 | 4 | 2.82 | 0.3700 | 11.4695 | immunity and defense |
| Human | 22_7 | 4 | 1.73 | 0.0992 | 14.5866 | segment specification |
| Human | 17_2 | 4 | 1.78 | 0.1067 | 15.6820 | oncogene |
| Human | 27 | 8 | 6.38 | 0.5352 | 16.5906 | cell proliferation and differentiation |
| Human | 3 | 2 | 1.69 | 0.6879 | 21.3259 | lipid, fatty acid and steroid metabolism |
| Human | 11 | 2 | 1.72 | 0.6911 | 21.4228 | other metabolism |
| Chimp | 16 | 5 | 2.19 | 0.0703 | 2.1796 | immunity and defense |
| Chimp | 13_6 | 2 | 0.18 | 0.0156 | 2.2935 | nuclear transport |
| Chimp | 14 | 3 | 1.04 | 0.0887 | 2.7503 | protein targeting and localization |
| Chimp | 14_1 | 2 | 0.22 | 0.0234 | 3.4462 | protein targeting |
| Chimp | 2 | 2 | 0.71 | 0.1635 | 5.0700 | amino acid metabolism |
| Chimp | 13 | 5 | 3.17 | 0.2528 | 7.8375 | intracellular protein traffic |
| Chimp | 5_2 | 2 | 0.36 | 0.0542 | 7.9622 | protein folding |
| Chimp | 1_7 | 2 | 0.42 | 0.0690 | 10.1361 | other polysaccharide metabolism |
| Chimp | 3 | 2 | 1.31 | 0.3819 | 11.8381 | lipid, fatty acid and steroid metabolism |
| Chimp | 31 | 43 | 38.80 | 0.3934 | 12.1949 | biological process unclassified |
| Mouse | 25 | 10 | 3.98 | 0.0090 | 0.2799 | apoptosis |
| Mouse | 9 | 4 | 1.65 | 0.0939 | 2.9113 | phosphate metabolism |
| Mouse | 13 | 17 | 11.57 | 0.1280 | 3.9668 | intracellular protein traffic |
| Mouse | 28 | 21 | 15.05 | 0.1401 | 4.3426 | cell adhesion |
| Mouse | 30 | 2 | 0.74 | 0.1838 | 5.6967 | miscellaneous |
| Mouse | 4_14 | 2 | 0.30 | 0.0481 | 7.0678 | RNA catabolism |
| Mouse | 13_1 | 6 | 2.80 | 0.0705 | 10.3565 | general vesicle transport |
| Mouse | 19 | 4 | 2.56 | 0.3342 | 10.3588 | muscle contraction |
| Mouse | 5 | 39 | 33.94 | 0.3579 | 11.0943 | protein metabolism and modification |
| Mouse | 4_5_1 | 8 | 3.95 | 0.0672 | 13.4467 | mRNA splicing |
| Rat | 7 | 4 | 1.72 | 0.1065 | 3.3018 | coenzyme and prosthetic group metabolism |
| Rat | 1_9 | 3 | 0.53 | 0.0232 | 3.4154 | monosaccharide metabolism |
| Rat | 4_13 | 7 | 2.79 | 0.0279 | 4.1082 | chromatin packaging and remodeling |
| Rat | 21 | 9 | 5.50 | 0.1866 | 5.7843 | sensory perception |
| Rat | 7_1 | 3 | 0.70 | 0.0421 | 6.1937 | coenzyme metabolism |
| Rat | 3 | 9 | 5.83 | 0.2013 | 6.2408 | lipid, fatty acid and steroid metabolism |
| Rat | 11 | 9 | 5.91 | 0.2061 | 6.3889 | other metabolism |
| Rat | 12_3_2 | 3 | 0.62 | 0.0319 | 6.3899 | steroid hormone-mediated signaling |
| Rat | 4_5 | 11 | 5.79 | 0.0533 | 7.8392 | pre-mRNA processing |
| Rat | 5 | 48 | 41.29 | 0.2770 | 8.5879 | protein metabolism and modification |
| Primate | 7 | 4 | 1.35 | 0.0539 | 1.6704 | coenzyme and prosthetic group metabolism |
| Primate | 1_9 | 3 | 0.42 | 0.0123 | 1.8145 | monosaccharide metabolism |
| Primate | 1_4 | 3 | 0.45 | 0.0146 | 2.1534 | gluconeogenesis |
| Primate | 9 | 4 | 1.57 | 0.0820 | 2.5407 | phosphate metabolism |
| Primate | 5_2 | 4 | 1.25 | 0.0438 | 6.4333 | protein folding |
| Primate | 5 | 39 | 32.28 | 0.2207 | 6.8428 | protein metabolism and modification |
| Primate | 3_1 | 3 | 0.77 | 0.0502 | 7.3828 | fatty acid metabolism |
| Primate | 25 | 6 | 3.79 | 0.2866 | 8.8837 | apoptosis |
| Primate | 10 | 2 | 1.09 | 0.3088 | 9.5725 | sulfur metabolism |
| Primate | 19 | 4 | 2.44 | 0.3166 | 9.8152 | muscle contraction |
| Rodent | 24 | 2 | 0.32 | 0.0533 | 1.6523 | blood circulation and gas exchange |
| Rodent | 16_2 | 2 | 0.14 | 0.0163 | 2.3945 | B-cell- and antibody-mediated immunity |
| Rodent | 4_5_1 | 10 | 4.19 | 0.0125 | 2.4958 | mRNA splicing |
| Rodent | 23 | 19 | 12.67 | 0.0824 | 2.5531 | cell cycle |
| Rodent | 20 | 5 | 2.29 | 0.0897 | 2.7804 | homeostasis |
| Rodent | 28 | 23 | 15.96 | 0.0906 | 2.8087 | cell adhesion |
| Rodent | 4_5 | 11 | 5.05 | 0.0208 | 3.0602 | pre-mRNA processing |
| Rodent | 15_2 | 5 | 1.54 | 0.0243 | 3.5726 | small molecule transport |
| Rodent | 26 | 23 | 16.47 | 0.1234 | 3.8263 | cell structure and motility |
| Rodent | 5 | 45 | 36.01 | 0.1288 | 3.9914 | protein metabolism and modification |
| Dog | 22_10_6 | 7 | 2.01 | 0.0072 | 1.4455 | hematopoiesis |
| Dog | 22 | 144 | 123.82 | 0.0557 | 1.7253 | developmental processes |
| Dog | 20_3 | 3 | 0.44 | 0.0181 | 2.6654 | calcium ion homeostasis |
| Dog | 22_8 | 81 | 62.45 | 0.0200 | 2.9471 | ectoderm development |
| Dog | 22_8_1 | 78 | 59.36 | 0.0174 | 3.4786 | neurogenesis |
| Dog | 17 | 28 | 21.28 | 0.1744 | 5.4051 | oncogenesis |
| Dog | 5_4 | 19 | 11.46 | 0.0474 | 6.9607 | proteolysis |
| Dog | 1_11 | 4 | 1.26 | 0.0503 | 7.4011 | other carbohydrate metabolism |
| Dog | 5 | 72 | 63.33 | 0.2750 | 8.5255 | protein metabolism and modification |
| Dog | 10 | 4 | 2.14 | 0.2835 | 8.7885 | sulfur metabolism |
