# Supplementary material for: Adaptive Evolution of Conserved Noncoding Elements in Mammals
Source: PLOS journal article supplement (doi:10.1371/journal.pgen.0030147), 2007-09-05
Supplement: S10 (10.1371/journal.pgen.0030147.s010) [file journal.pgen.0030147.s010]

Supplementary Table 10: Comparison between the 49 human accelerated regions (HARs) [[1](#PollardEtAl06)] and our CNCs. Among the 49 HARs, 11 and 23 HARs are overlapped with our mammalian (M) and amniotic (A) CNCs, respectively. All of the HARs are embedded in our CNCs. The difference in size between each HAR and the corresponding CNC is shown in the fifth column (Diff). The p-values correspond to our SRTh statistics, and are computed based on the empirical null distribution obtained from the simulation study. The SRT tests the alternative hypothesis in which each of the seven lineages evolves with its own rate.

| HAR ID | Group | CNC Size | HAR Size | Diff | LRTHAR | SRTh | p-value | SRT |
| --- | --- | --- | --- | --- | --- | --- | --- | --- |
|  |  |  |  |  |  |  |  |  |
| HAR1 | A | 147 | 105 | 42 | 60.31 | 9.35 | 0.0002 | 94.62 |
| HAR2 | A | 542 | 118 | 424 | 35.62 | 5.88 | 0.0002 | 50.99 |
| HAR3 | A | 225 | 105 | 120 | 14.40 | 4.88 | 0.0002 | 40.29 |
| HAR4 | A | 460 | 118 | 342 | 13.88 | 2.73 | 0.0022 | 16.65 |
| HAR7 | A | 254 | 101 | 153 | 9.64 | 3.10 | 0.0012 | 21.38 |
| HAR8 | A | 314 | 232 | 82 | 9.57 | 2.87 | 0.0002 | 13.34 |
| HAR9 | A | 291 | 222 | 69 | 9.29 | 2.90 | 0.0002 | 18.01 |
| HAR10 | M | 301 | 102 | 199 | 9.17 | 3.01 | 0.0008 | 10.76 |
| HAR12 | A | 468 | 131 | 337 | 8.98 | 2.91 | 0.0018 | 18.30 |
| HAR13 | M | 298 | 228 | 70 | 8.92 | 3.58 | 0.0002 | 30.90 |
| HAR15 | A | 518 | 324 | 194 | 8.65 | 5.35 | 0.0002 | 43.10 |
| HAR16 | A | 743 | 415 | 328 | 8.54 | 1.92 | 0.0232 | 12.28 |
| HAR21 | M | 194 | 100 | 94 | 7.94 | 2.48 | 0.0052 | 28.51 |
| HAR22 | A | 252 | 111 | 141 | 7.88 | 2.54 | 0.0052 | 23.86 |
| HAR24 | A | 522 | 263 | 259 | 7.78 | 2.07 | 0.0158 | 10.37 |
| HAR25 | A | 853 | 140 | 713 | 7.72 | 1.97 | 0.0203 | 10.80 |
| HAR26 | M | 231 | 113 | 118 | 7.48 | 4.93 | 0.0002 | 30.11 |
| HAR27 | M | 446 | 222 | 224 | 7.43 | 2.53 | 0.0032 | 15.21 |
| HAR28 | A | 225 | 103 | 122 | 7.42 | 1.76 | 0.0403 | 7.50 |
| HAR29 | A | 142 | 116 | 26 | 7.36 | 2.79 | 0.0012 | 17.03 |
| HAR30 | M | 196 | 104 | 92 | 7.13 | 2.44 | 0.0068 | 8.37 |
| HAR31 | A | 215 | 158 | 57 | 7.01 | 2.33 | 0.0048 | 12.64 |
| HAR32 | A | 217 | 110 | 107 | 6.99 | 1.53 | 0.0483 | 8.97 |
| HAR33 | A | 183 | 115 | 68 | 6.98 | 3.52 | 0.0002 | 15.27 |
| HAR34 | M | 1050 | 139 | 911 | 6.91 | 3.91 | 0.0002 | 34.15 |
| HAR35 | A | 514 | 121 | 393 | 6.83 | 2.47 | 0.0058 | 10.20 |
| HAR36 | A | 382 | 159 | 223 | 6.80 | 1.68 | 0.0403 | 24.79 |
| HAR39 | M | 321 | 219 | 102 | 6.72 | 2.81 | 0.0028 | 9.92 |
| HAR41 | M | 447 | 193 | 254 | 6.57 | 3.01 | 0.0012 | 14.47 |
| HAR43 | M | 250 | 117 | 133 | 6.53 | 3.26 | 0.0002 | 15.19 |
| HAR46 | A | 261 | 112 | 149 | 6.47 | 2.46 | 0.0058 | 13.53 |
| HAR47 | M | 535 | 109 | 426 | 6.42 | -0.66 | 0.7358 | 3.11 |
| HAR48 | A | 344 | 181 | 163 | 6.35 | 2.61 | 0.0032 | 18.56 |
| HAR49 | A | 398 | 145 | 253 | 6.28 | 1.39 | 0.0683 | 5.39 |

**Reference:**

1. Pollard KS, Salama SR, Lambert N, Lambot MA, Coppens S, et al. (2006) An RNA gene expressed during cortical development evolved rapidly in humans. Nature 443:167-172.
