# Supplementary material for: Adaptive Evolution of Conserved Noncoding Elements in Mammals
Source: PLOS journal article supplement (doi:10.1371/journal.pgen.0030147), 2007-09-05
Supplement: S14 (10.1371/journal.pgen.0030147.s014) [file journal.pgen.0030147.s014]

Supplementary Table 14: Three choices of penalty functions for the two classes of models that are considered in the modified AIC. Each penalty is adjusted so that the null model (the number of parameters is 1) has zero penalty.

| Number of parameters | AIC | Ewens | AIC+Ewens |
| --- | --- | --- | --- |
|  |  |  |  |
| 1 | 0.00 | 0.00 | 0.00 |
| 2 | -1.00 | -1.79 | -2.79 |
| 3 | -2.00 | -3.40 | -5.40 |
| 4 | -3.00 | -4.79 | -7.79 |
| 5 | -4.00 | -5.89 | -9.89 |
| 6 | -5.00 | -6.58 | -11.58 |
| 7 | -6.00 | -6.58 | -12.58 |

| Number of parameters | Partition | AIC | Ewens | AIC+Ewens |
| --- | --- | --- | --- | --- |
|  |  |  |  |  |
| 2 | H C  M R P T D | -1.00 | -3.40 | -4.40 |
| 2 | H C P  M R T D | -1.00 | -4.09 | -5.09 |
| 2 | M R T  H C P D | -1.00 | -4.09 | -5.09 |
| 2 | M R  H C P T D | -1.00 | -3.40 | -4.40 |
| 3 | H C  P  M R T D | -2.00 | -4.79 | -6.79 |
| 3 | M R  T  H C P D | -2.00 | -4.79 | -6.79 |
